# Supplementary material
Source: PubMed Central journal article supplement (PMC5884382)
Supplement: kccy-17-02-1395534-s001.pdf [file kccy-17-02-1395534-s001.pdf]

## Supplemental materials

### Notch1 regulates tongue cancer cells proliferation, apoptosis and invasion

Rui-huan Gan<sup>1\*</sup>, Hua Wei<sup>2\*</sup>, Jing Xie<sup>1\*</sup>, Dan-ping Zheng<sup>1</sup>, Er-ling Luo<sup>1</sup>, Xiao-yu Huang<sup>1</sup>, Jian Xie<sup>1</sup>, Yong Zhao<sup>3</sup>, Lin-can Ding<sup>1</sup>, Bo-hua Su<sup>1</sup>, Li-song Lin<sup>4</sup>, Da-li Zheng<sup>5</sup>, You-guang Lu<sup>1</sup>

#### Tables:

Table S1. The siRNA sequences

| Name       | Sequences                     |
|------------|-------------------------------|
| NC         | 5'-UUCUCCGAACGUGU CACGUTT-3'  |
|            | 5'-ACGUGACACGUUCG GAGAATT-3'  |
| siRNA-1166 | 5-CCAACCCUGUCA AUGGCAATT-3    |
|            | 5-UUGCCAUUGACAGGGUUGGTT-3     |
| siRNA-2010 | 5'-CAGGGAGCAUGUGU AACAU TT-3' |
|            | 5'-AUGUUACACAUGCU CCCUGTT-3'  |

Table S2. Real-time PCR primers

| Gene   | Forward                | Reverse                |
|--------|------------------------|------------------------|
| Notch1 | GGAAGTTGAACGAGCATAGTCC | GCATGATGCCTACATTTCAAGA |
| Notch2 | TATGTTCAAGTGCAGGAATTGG | AGAGTCGGGAATTCACCTGTTA |
| Notch3 | CTTCCCTTACCACCGGCCTAG  | GCAGTGATCATTCTCAGGCGAC |
| Notch4 | CCTCACAGGCTCCCACTCTG   | TGAAGGAGCCAGGAGTGTTGAG |
| ACTB   | GACAGGATGCAGAAGGAGATCA | TTTAGGATGGCAAGGGACTTC  |

Table S3. Antibody dilution multiple

| Antibody                                                 | Dilution multiple |
|----------------------------------------------------------|-------------------|
| Notch1 (Sigma, Germany, Cat. NO. N4788)                  | 1:500             |
| $\beta$ -actin (Sigma, Germany, Cat. NO. A2228)          | 1:2000            |
| Goat Anti-Rabbit IgG-HRP (Boster, China, Cat.NO. BA1054) | 1:2000            |
| Goat Anti-Mouse IgG-HRP (Boster, China, Cat.NO. BA1050)  | 1:5000            |

**Figures:**

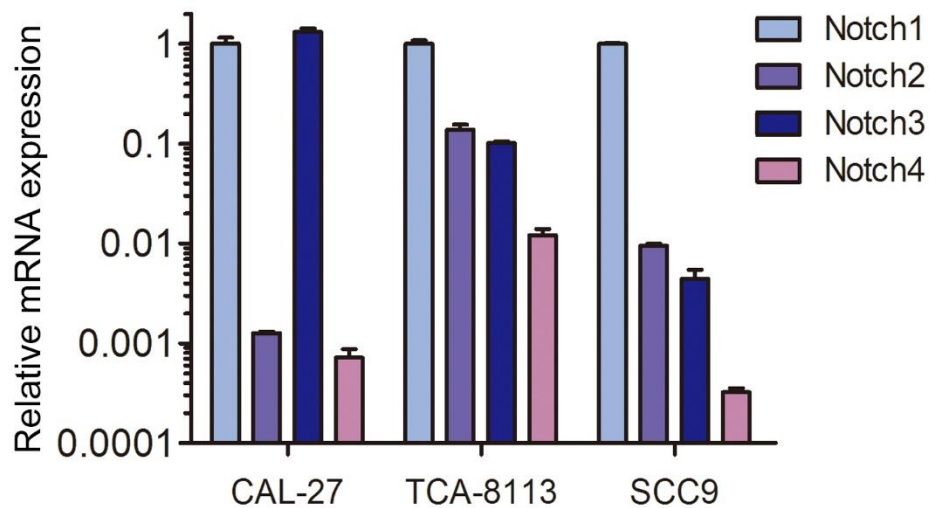

**Figure S1: The expression of Notch receptors in tongue cancer cell lines.** The expression of four Notch receptors were detected by real-time PCR in three different tongue cancer cell lines.

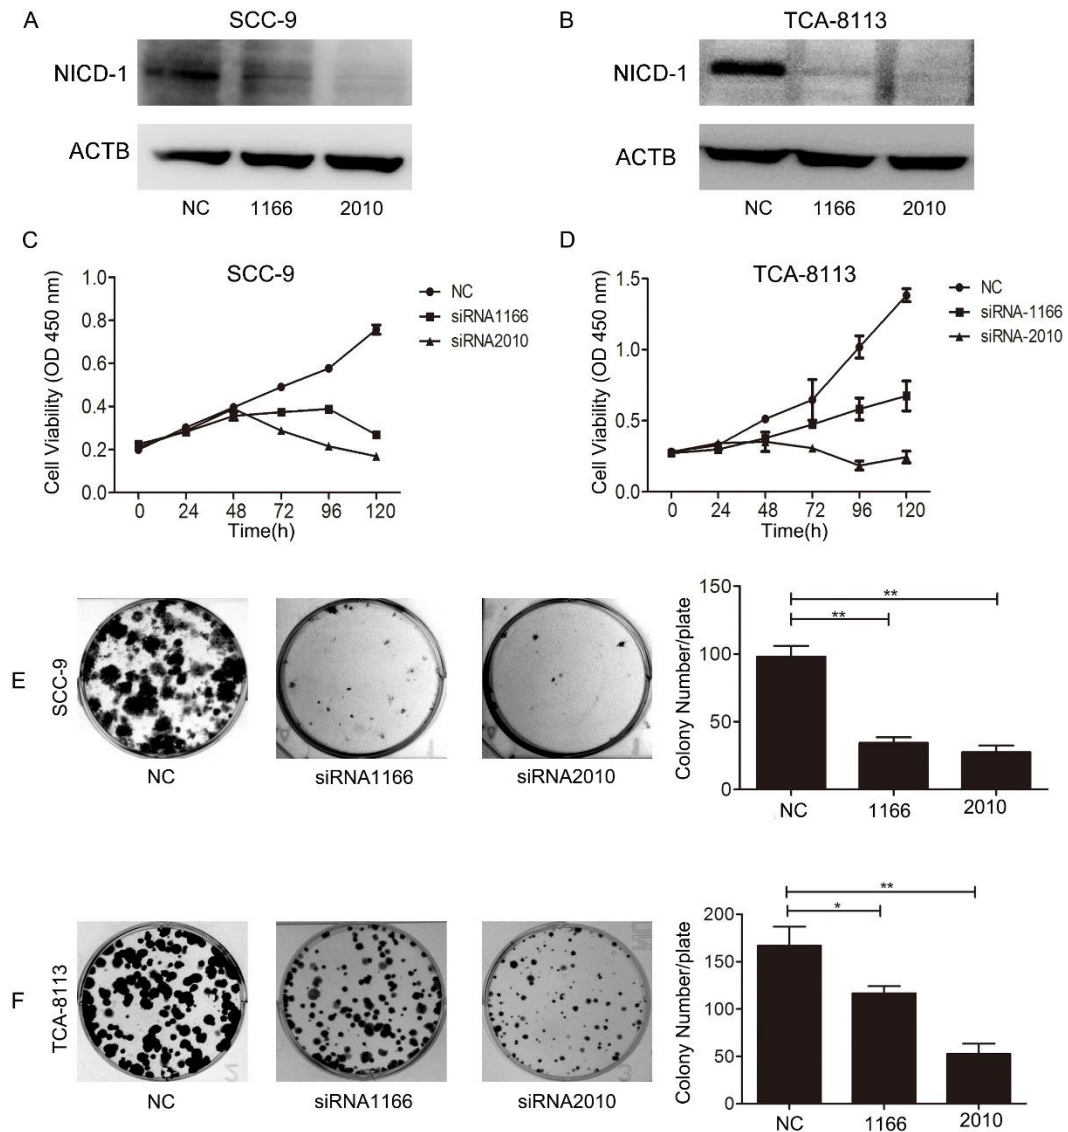

**Figure S2: Knockdown of Notch1 inhibited tongue cancer cells proliferation.** After siRNA transfection in SCC-9 and TCA-8113 cells, the expression of Notch1 was detected by Western blotting (A and B); the cells proliferation ability was measured by CCK8 assay in the same time point (C and D,  $p < 0.01$  from 72 h to 120 h) and colony-formation assay (E and F)

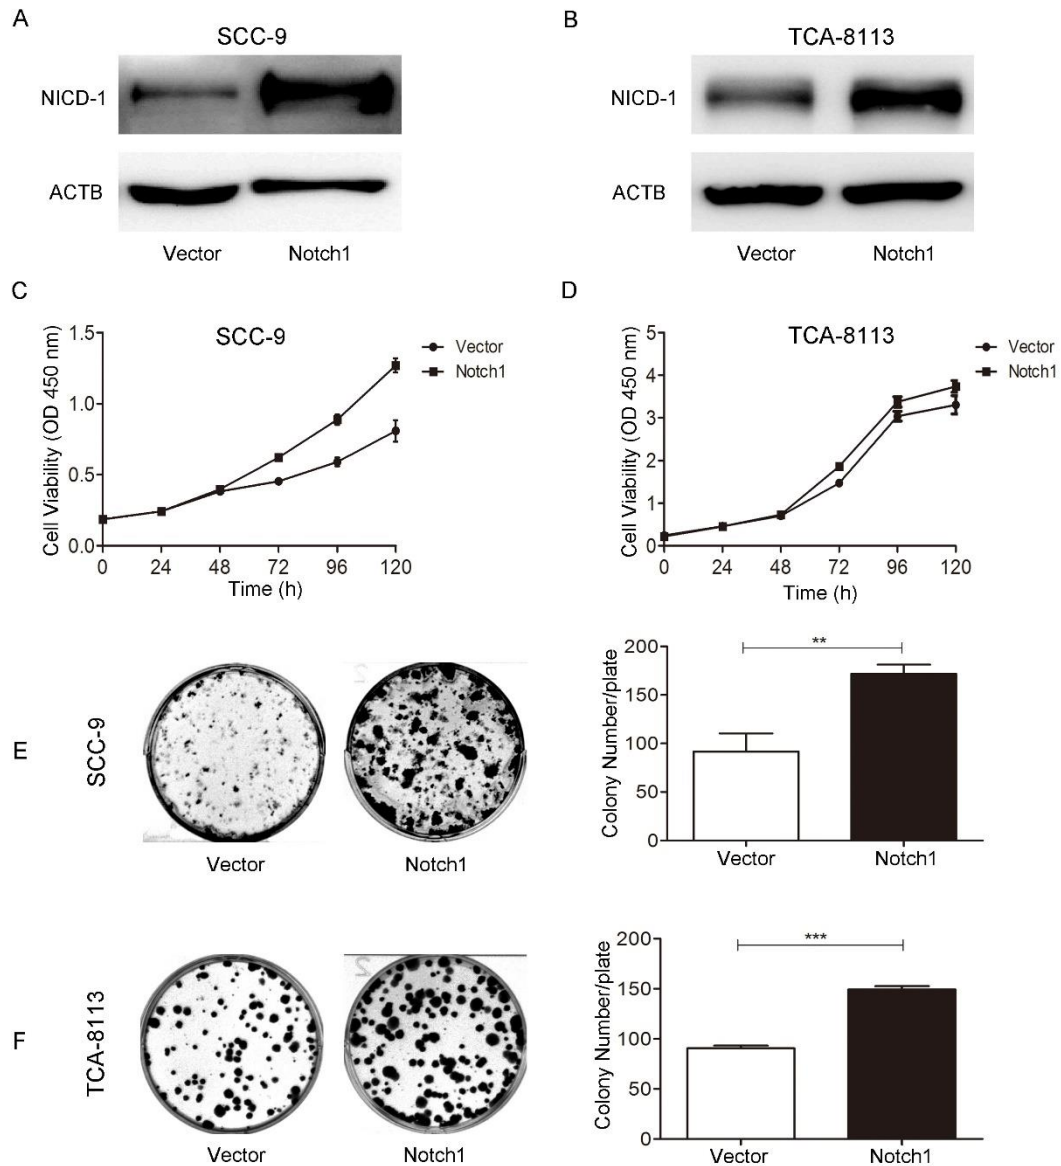

**Figure S3: Overexpression of Notch1 enhanced tongue cancer cells proliferation.** After overexpression of Notch1 in SCC-9 and TCA-8113 cells by plasmid, the expression of Notch1 was detected by Western blotting (A and B); the cells proliferation ability was measured by CCK8 assay in the same time point (C and D,  $p < 0.01$  from 72 h to 120 h) and colony-formation assay (E and F).

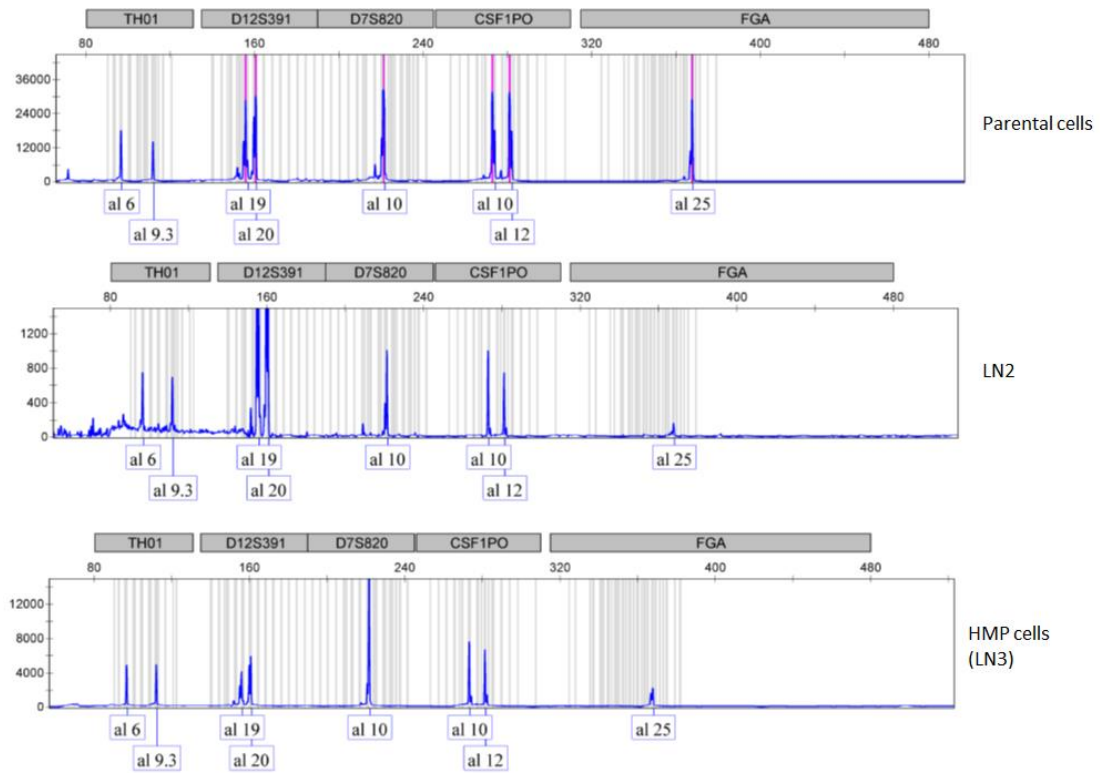

**Figure S4: Representative images of STR analysis of CAL-27 and high metastatic potential cells.**
